## RESEARCH ARTICLE

# Behavioural synchronization in a multilevel society of feral horses

Tamao Maeda<sup>1\*</sup>, Cédric Sueur<sup>2,3</sup>, Satoshi Hirata<sup>1</sup>, Shinya Yamamoto<sup>1,4</sup>

**1** Wildlife Research Centre, Kyoto University, Kyoto, Japan, **2** Institut Pluridisciplinaire Hubert Curien, Université de Strasbourg, CNRS, Strasbourg, France, **3** Institut Universitaire de France, Paris, France, **4** Institute for Advanced Study, Kyoto University, Kyoto, Japan

\* [maeda.tamao.76a@st.kyoto-u.ac.jp](mailto:maeda.tamao.76a@st.kyoto-u.ac.jp)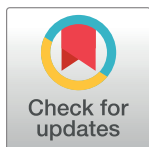

## Abstract

Behavioural synchrony among individuals is essential for group-living organisms. The functioning of synchronization in a multilevel society, which is a nested assemblage of multiple social levels between many individuals, remains largely unknown. The aim of the present study was to build a model that explained the synchronization of activity in a multilevel society of feral horses. Multi-agent-based models were used based on four hypotheses: A) horses do not synchronize, B) horses synchronize with any individual in any unit, C) horses synchronize only within units, and D) horses synchronize across and within units, but internal synchronization is stronger. The empirical data obtained from drone observations best supported hypothesis D. This result suggests that animals in a multilevel society coordinate with other conspecifics not only within a unit but also at an inter-unit level. In this case, inter-individual distances are much longer than those in most previous models which only considered local interaction within a few body lengths.

## OPEN ACCESS

**Citation:** Maeda T, Sueur C, Hirata S, Yamamoto S (2021) Behavioural synchronization in a multilevel society of feral horses. *PLoS ONE* 16(10): e0258944. <https://doi.org/10.1371/journal.pone.0258944>

**Editor:** Johann Mourier, Institut de Recherche pour le Développement, FRANCE

**Received:** September 16, 2021

**Accepted:** October 6, 2021

**Published:** October 26, 2021

**Peer Review History:** PLOS recognizes the benefits of transparency in the peer review process; therefore, we enable the publication of all of the content of peer review and author responses alongside final, published articles. The editorial history of this article is available here: <https://doi.org/10.1371/journal.pone.0258944>

**Copyright:** © 2021 Maeda et al. This is an open access article distributed under the terms of the [Creative Commons Attribution License](https://creativecommons.org/licenses/by/4.0/), which permits unrestricted use, distribution, and reproduction in any medium, provided the original author and source are credited.

**Data Availability Statement:** The relevant data and models are available at the following link: <https://doi.org/10.5061/dryad.c866t1g3b>

**Funding:** This study was supported by KAKENHI (No. 19H05736, 17H0582, 19H00629 to Shinya

## Introduction

Behavioural synchronization is the phenomenon where multiple individuals perform the same behaviours at the same time by mirroring each other, either consciously or unconsciously [1]. The patterns of synchronous activity have been found in many animals and with many different behaviours, from Placozoa to humans [2]. The common property of this collective behaviour is that relatively simple interactions among the members of the group can explain a global pattern of behaviour [3]. For example, a pattern of fission-fusion in some ungulate species could be simply explained by the dynamic tension between the advantages of aggregation and the disagreement among individuals, mainly between females and males, due to the variation in resource demand [4, 5]. Synchronization of behaviour is essential for animals to maintain the functions of a group and thus enhance their fitness and survival [1]. Fundamentally, animals need to synchronize the timing and direction of their movements to keep an aggregation [3]. Furthermore, it has been reported that synchronization can increase efficiency in their vigilance and defensive behaviours (like mobbing) against predators [6], as well as facilitating social interactions and enhancing social bonds [7, 8].

Yamamoto, No. 18H05524 to Satoshi Hirata, No. 16H06283 to Tetsuro Matsuzawa, No. 20J20702 to Tamao Maeda), JSPS LGP-U04 to Tamao Maeda, and Kyoto University SPIRITS to Shinya Yamamoto. KAKENHI/JSPS: <https://www.jspis.go.jp/english/index.html> SPIRITS: <https://www.kura.kyoto-u.ac.jp/en/support/ekkyo/spirits/>.

**Competing interests:** The authors have declared that no competing interests exist.

Many studies on synchronization were conducted on cohesive, single-layered groups, in either natural or experimental setups [6, 9–11]. In several social animals, social networks have a considerable effect on the propagation of behaviour [2, 12–16]. Socially central individuals can have a greater influence than subordinate individuals on group behaviour [17, 18]. Also, it was widely observed that socially affiliated dyads more intensely synchronized their behaviours [9, 19]. However, most studies which examined the social network effect were conducted on small, cohesive groups (but see [14]) whilst studies with large groups of individuals were based on anonymous mechanisms because of the difficulty in identifying and following all members.

Multilevel societies composed of nested and hierarchical social structures are considered to be among the most complex forms of social organization for animals [20–22]. In a multilevel society, the fundamental component is called a ‘unit’, and these units gather to form larger groups. While a higher-level social organization usually shows a fission-fusion pattern where units move independently and decide whether to join a temporal multi-unit group in the long term [23], they show collective and synchronized behaviour among different units when they form the multi-unit group [24, 25]. The most famous example of multilevel society is the troop, a third- or fourth-level social organization, of hamadryas baboons sleeping together on a cliff [26]. It is highly likely that synchrony occurs not only among the same units but also in a higher level of social organization, but studies on their synchronization mechanisms and functions are quite limited [27].

Multilevel society is characterised by a different association pattern in each social level. Usually, members of a unit stay close together, while the extent of cohesion becomes smaller as the social level increases [20, 23, 25, 28, 29]. Some studies have found that different units keep an intermediate distance from each other, staying farther apart than the inter-individual distance within units [30] but closer than random distribution [29]. It is argued that this differentiation of social relationships has evolved to balance the advantages of being a large group and the disadvantages of resource competition with other units [31–33]. For example, a study on golden snub-nosed monkeys (*Rhinopithecus roxellana*) suggested that harem unit aggregation could reduce the risk of inbreeding and bachelor threat, but being a large group may cause intense competition for food; hence, their aggregation pattern changes according to the seasonal prevalence of resources [23]. It was assumed that this fission-fusion pattern, which balances the competition and cooperation between units, could also be applied to behavioural synchronization. Whether multi-level societies show behavioural synchronization remains unclear, but it is important to address this question in order to better understand the collective features of such societies.

New technologies enable more wide-ranging and accurate data collection in societies with hundreds of individuals [34–36]. For instance, our use of drones succeeded in obtaining positional and behavioural data of a multilevel society composed of more than a hundred feral horses in Portugal. The research identified a two-layered structure of units (combinations of individuals that stayed closer than 15.5m over 70% of the time) nested within a herd (i.e., the observed inter-unit distance was significantly smaller than that of permuted data sets), and the permutation analysis confirmed that the herd formation consisting of multiple units was not because of confounding effects, such as resource distribution [29]. The current study further applies these data to investigate whether a horse multilevel society shows synchrony in resting/moving timing and, if so, whether the extent of synchronization changes within and across units.

It is hypothesized that (1) horses synchronize their behaviour both at intra- and inter-unit levels and (2) the extent of synchronization in a dyad is correlated to its social relationships. In this study, different models were developed based on hypotheses ranging from no synchronization between individuals and units to full synchronization, with intermediate mechanisms based on social networks. In this way, this study develops a stochastic multi-agent-based model where the probability of an individual to change the stage (resting versus moving)

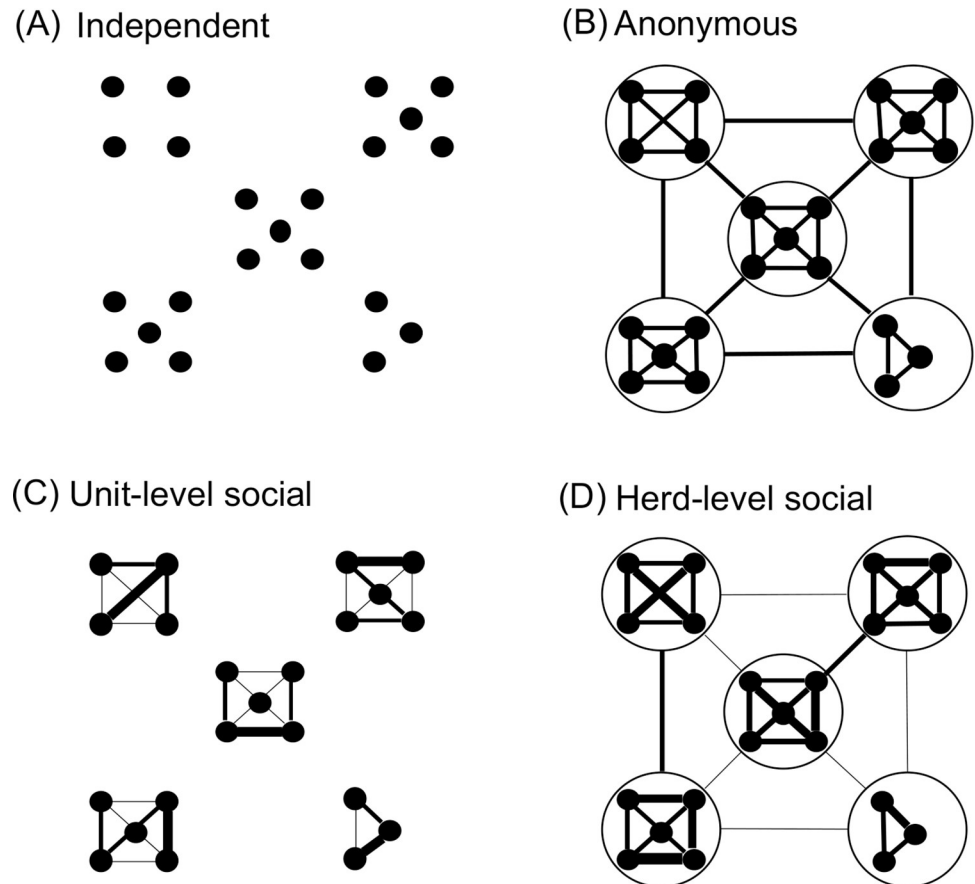

**Fig 1. A graphic representation of synchronization models.** The dots represent individual agents and the clusters of dots represent units. Agents/units connected with lines imply that their states were affected by each other. The width of the lines represents the strength of synchronization.

<https://doi.org/10.1371/journal.pone.0258944.g001>

depends on different hypotheses. (A) Independent: horses do not synchronize and are socially independent. This hypothesis is used as the null model. (B) Anonymous: horses synchronize with any individual in any unit. This hypothesis does not include the importance of stable social relationships in the trade-off between group-living advantages and competition. (C) Unit-level social: horses synchronize only within units, not considering the herd-level association and without the advantages of large societies. (D) Herd-level social: horses synchronize across and within units, but internal synchronization is stronger (Fig 1). Hypothesis D could achieve the best balance between the intra- and inter-unit level associations. Finally, these models are compared with empirical data to assess which models best explain synchronization in the present study's population of feral horses.

## Methods

### (a) Data collection

Observations were conducted from 6th June to 10th July, 2018, in Serra D'Arga, Portugal, where approximately 150 feral horses were living without human care [37]. The field site had two large flat areas, Zone 1 and 2, which were visually separated by rocky hills (see Fig 3 of [29]). These areas were separated because horses moving between them during daytime was rarely observed. Drones (Mavic Pro: DJI, China) were used to accurately measure the distances

between all individuals in the observation area of two zones covering approximately 1 km<sup>2</sup> each. The flights were performed under clear sky conditions at an altitude of 30–50 m from the ground and successive aerial photographs of the horses present at the site were taken in 30-minute intervals from 9:00–18:00 (for more detailed explanation, see [29]). The average duration of each flight was 4 minutes 24 seconds  $\pm$  3 minutes 5 seconds. The field observations complied with the guidelines for animal studies in the wild issued by the Wildlife Research Center of Kyoto University, Japan (<https://www.wrc.kyoto-u.ac.jp/guidelines/wild.html>; in Japanese), and we signed a Memorandum of Understanding with the Viana Do Castelo municipality, which governs the study area and our field station. No further formal permission was required prior to conducting our research.

Orthomosaic imaging was conducted using AgiSoft PhotoScan Professional software. The software connected successive photos and created orthophotographs in the GeoTIFF format under the WGS 84 geographic coordinate system. All horses were first identified from the ground, following which an identification sheet was made for all individuals, recording their sex (whether they had testes); estimated age class; and physical characteristics such as colour, body shape, and white markings on the face and feet (Fig 2). The adults were individuals who experienced dispersal from their natal group, the young were those who were born in or before 2017 and still belonged to their natal group, and the infants were individuals born in 2018. All horses in the orthophotographs were identified accordingly. The heads of the horses were positioned and we recorded their resting status. The horses were considered to be resting if they did not move in the successive photos and showed a resting posture, that is, laying down or standing still with their neck parallel to the ground. Otherwise, they were considered to be moving. All locations were stored in shapefile formats. The coordinate system was converted to a rectangular plain WGS 84 / UTM Zone 29N and the distances were calculated between all pairs of individuals in the same zone. In total, 243 observations were conducted in 20 days and a total of 23,716 data points of individual positions were obtained (for detailed availability and number of observations each day, see S1 Fig). A total of 126 non-infant horses (119 adults: 82 females and 37 males; 7 young individuals: 6 females and 1 male) and 19 infants (11 females and 8 males) were successfully identified. They belonged to 23 units (21 harems and 2 AMUs; all-male unit), along with 5 solitary males. One adult female, named Oyama from Kanuma harem, disappeared sometime between the evening of 15th June and the morning of 16th

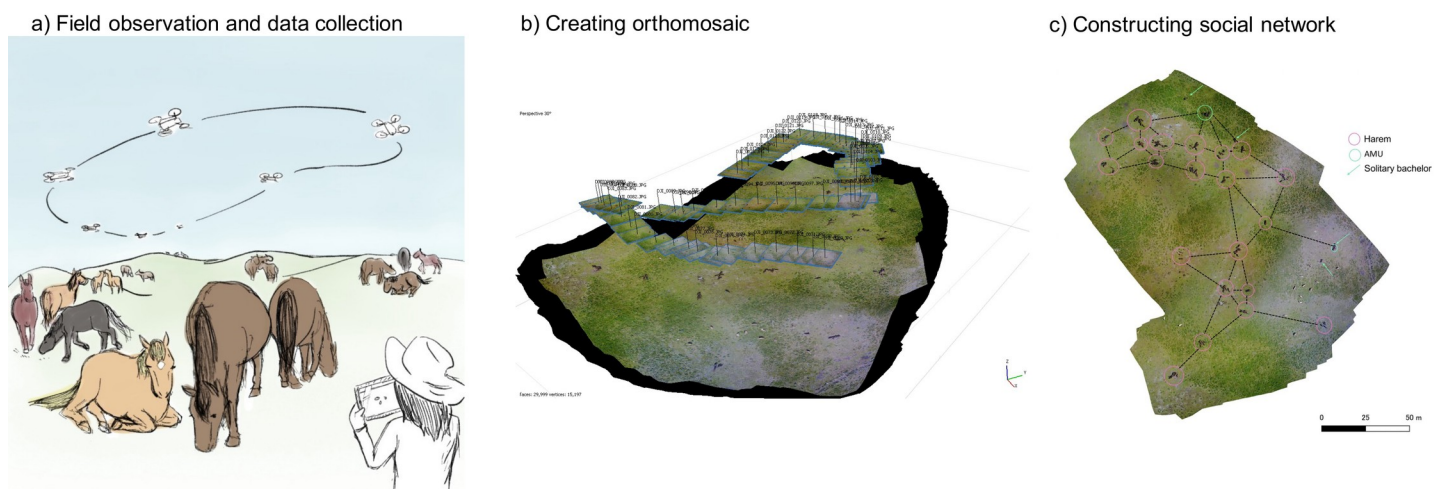

**Fig 2. Overall research procedure.** (a) Aerial photos of horses were taken using drones. (b) These successive photos were stitched together to create an orthomosaic. (c) Individuals in orthomosaics were identified, and the positional and behavioural data of horses were obtained. The social network was then constructed using inter-individual distance data. The photograph is also used in Maeda et al., (2021) published in Scientific Reports.

<https://doi.org/10.1371/journal.pone.0258944.g002>

June, probably preyed on by wolves. This female and two solitary males which were never located within 11m of other individuals were eliminated from the subsequent analysis. Infants were also eliminated because their position was highly dependent on their mothers.

### (b) Herd social network

To create a social network, the threshold distance which defines the association was first decided. A histogram of inter-individual distance data was created under the R environment. The bin width was decided based on the method used in [38] and using R package ‘KernSmooth’ [39]. As shown in Fig 3, the histogram had two peaks—at the 2nd bin (0.9–1.8m) and at the 55th bin (49.7–50.6m) with a bin width of 0.92m. The minimum frequency, or nadir, between these two peaks was observed at the 12th bin (10.1–11.0m), and this was selected as the threshold distance that divides the intra- and inter-unit association (cf. [29]).

To obtain the social relationships for each dyad  $a_{ik}$ , networks were generated for each sampling period (i.e., each flight of drones). Pairs of horses whose inter-individual distance was smaller than 11m were assigned an edge weight of 1, based on the threshold distance defined above. When two individuals were connected with each other indirectly via another individual, they were also considered to be connected (edge weight = 1). All other pairs were assigned an edge weight of 0. In the total number of drone flights, 658 temporarily isolated individuals who had no association with any other individuals were detected. If the distance from the nearest individual was smaller than  $p_2$  (the second peak of the histogram), it was presumed that they had an association with the nearest neighbour; otherwise, they were eliminated from the analysis. A total of 643 out of 658 isolated points were within 50.6m (the second peak of histogram) from the nearest individual. A social network was created from these co-membership data using the simple ratio index [40]. This calculates the probability that two individuals are

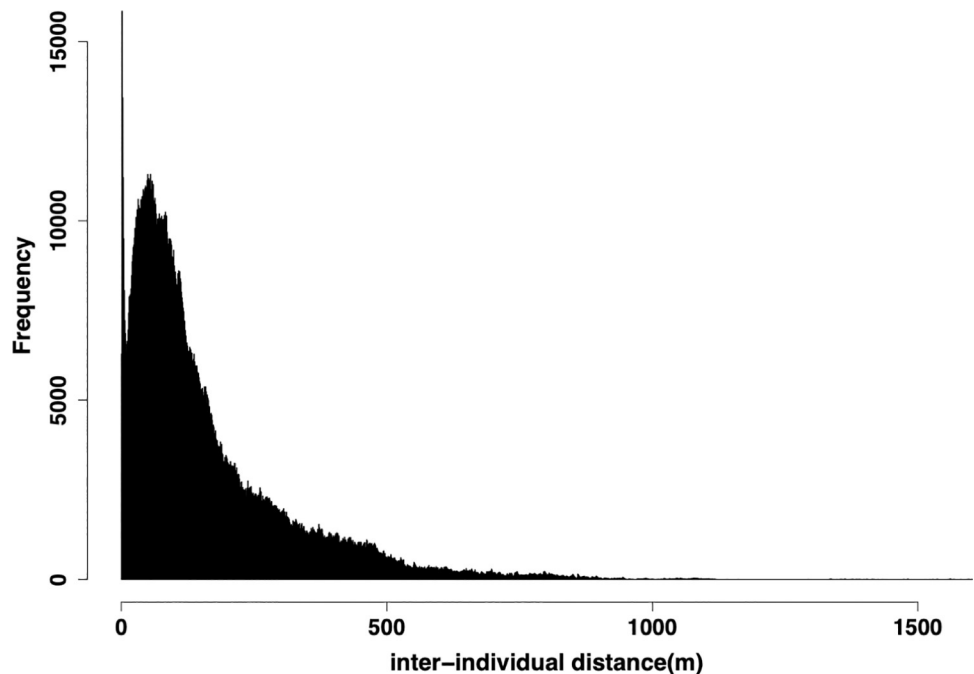

**Fig 3. Histogram of inter-individual distances showing clear bimodality.** The distance of the first and second peaks could be considered as the most frequent value of inter-individual distances within a unit and between units, respectively. The trough between two peaks represents the threshold that divides the intra- and inter-unit association. This figure is reprinted from Fig 2A in Maeda et al., (2021).

<https://doi.org/10.1371/journal.pone.0258944.g003>

observed together given that one has been seen, which is widely used in animal social network analysis. The density of the network was  $0.047 \pm 0.177$  (average  $\pm$  SD). The edge weight was normalized so that the sum of  $a_{ik}$  ( $k = 1, 2, \dots, N; k \neq i$ ) became  $N$  (in other words, average network weight became 1.0).

### (c) Synchronization data scoring and calculation of modelling parameters

**Population synchronization rate.** At each time step (in this case, a scan every 30 minutes), the number  $N$  of horses and their identities in each state ( $S_r$  for resting and  $S_m$  for moving) were recorded. As explained previously, resting is standing still or laying down, and moving is any other behaviour, mainly grazing. Only observations when more than 90% (21 out of 23) of the units were available in the field were used. 21–23 units were observed in 8 out of 19 days during 14th–28th June and 5th July. The data from 5th July was not included, although 21 units were available, since horses foraged on the edge of the field site (rocky area with many obstacles), which may limit their vision. One AMU was not observed on the 15<sup>th</sup> and 16<sup>th</sup>, and one harem and one AMU were not observed on the 28<sup>th</sup> (S1 Fig). A synchronization rate of a dyad was defined as a proportion of the observation when two individuals were in the same activity state, that is, a score of 1 was given when two individuals were in the same state (e.g., resting or moving) in an observation and 0 when not, following which the average was calculated. During the daytime, the memberships of the multi-unit group rarely changed (one harem joined a group after observation started on 15<sup>th</sup>, 16<sup>th</sup>, and 18<sup>th</sup> June).

**Individual synchronization/state phase latency.** A synchronization phase  $P_{r:m}$  was defined as a ‘resting  $\rightarrow$  moving’ event when there was a continuous decrease of resting individuals from the minimal to the maximal and a phase  $P_{m:r}$  ‘moving  $\rightarrow$  resting’ event as the opposite (Fig 4). The increase/decrease was excluded from the first or last observation of the day. In total, 21 moving  $\rightarrow$  resting events and 18 resting  $\rightarrow$  moving events were found. The state phase latency  $\Delta T_{01s}$  was calculated as the time elapsed between the end of one state phase and the beginning of the next one. In previous works, this phase latency corresponds to the departure latency on an individual to change state [13, 17, 41, 42]. The value  $\Delta T_{01r}$  corresponds to the resting phase latency and  $\Delta T_{01m}$  to the moving phase latency (Table 1 and S1 Appendix). For explanations of modelling self-organisation and collectives, see also [13].

**Individual refractory period.** Many synchronization processes in animal groups imply a refractory period, which is the short time period after an individual has changed their state and then appears insensitive to their neighbours [2, 43]. Theoretical studies showed that this period is necessary for animals to not be stuck in a state [2, 43], and preliminary works on our model also showed that, to avoid observing agents being stuck in a state, the refractory period is necessary. According to the observed data, the mean refractory period was 50 minutes for moving and 25 minutes for resting (S2 Fig). These values, as well as lower and higher values of the refractory period, were used to check the fitness of simulations to the empirical data (see supplementary material and section (d)). The changing state latency  $\Delta T_{j-1,j,s}$  of each horse  $j$  changing state  $s$  corresponding to the time elapsed between the state change of the individual  $j-1$  was then scored, i.e., the previous individual changing state  $s1$  to  $s2$ , and the state change of the horse  $j$  (changing also from  $s1$  to  $s2$ ). The expected value of  $\Delta T_{j-1,j,m}$  and  $\Delta T_{j-1,j}$ , were 2.3 and 1.3 minutes, respectively (Table 1 and Fig S2 in S2 Appendix).

The aims of this study were to understand the synchronization process of horses between two states—moving and resting—throughout the day. We considered that, in a multilevel society, individuals synchronize across and within units but their internal synchronization is stronger. In other words, the synchronization should be similar to their spatial association pattern, where intra-unit cohesion is quite strong but the inter-unit cohesion is moderate.

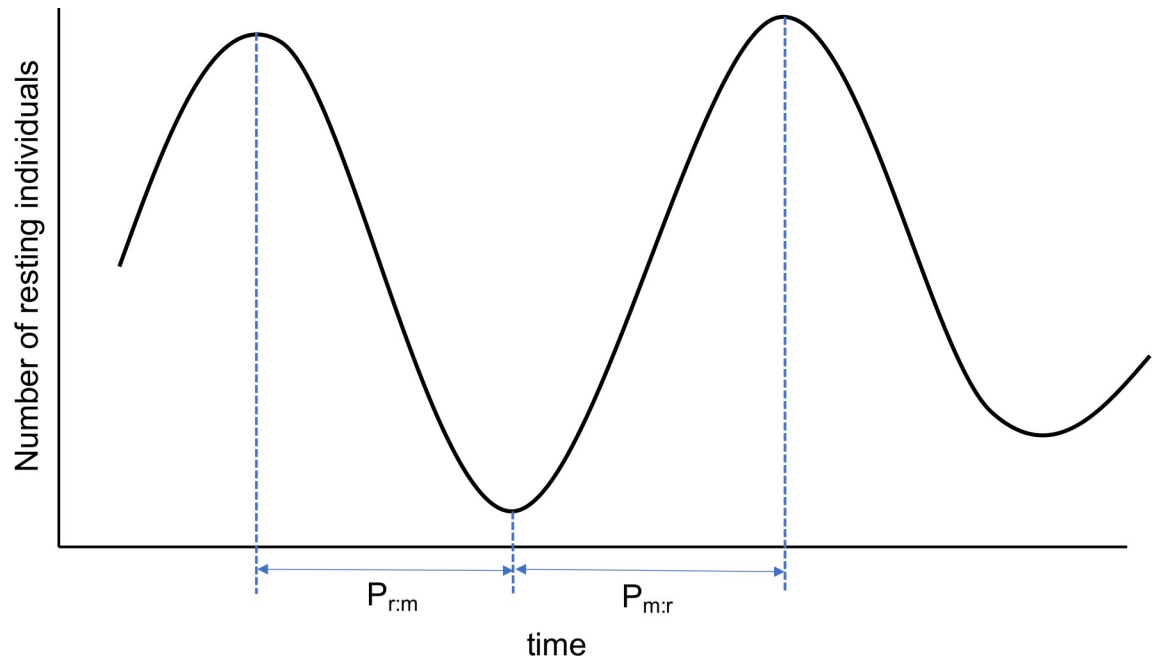

**Fig 4. The explanation of  $P_{m:r}$  and  $P_{r:m}$ .**

<https://doi.org/10.1371/journal.pone.0258944.g004>

According to the preliminary analysis, the horses' resting/moving was independent of the time of day (see [S2 Appendix](#) for detailed explanation); thus, the effect of time was not considered in the following models.

**Model design.** The overall design of the models is shown in [Fig 1](#). The model is stochastic and individualistic [[13](#), [43](#)], signifying that the probability of each individual to change state, not the collective probability or state, is considered. This concept was followed as we introduced the selective mimetism (mimetism based on social relationships) as a hypothesis, and this can be done only by calculating probabilities per individuals [[13](#), [17](#)]. This bottom-up approach is also better than the top-down one for understanding individual decision processes. The probability of individuals to change states, mimetic-coefficient and refractory time period of resting/moving, and social relationships from the data set were obtained ([Table 1](#), details about calculations are given below). The probability  $\Psi_1$  ( $N\lambda$ ), mimetic coefficient  $C$ , and refractory time period  $\Delta T_{01}$  ( $= 1/\Psi_1$ ) of moving were calculated as 0.04, 0.796, and 25 minutes and those of resting were 0.02, 0.426, and 50 minutes, respectively ([Table 1](#) and [S1 Fig](#)). A simulation (one day) extending 9 hours (540 minutes) with 18 observations was conducted, and the simulations were repeated 100 times for each hypothesis. The model was also tested with different parameter sets to investigate its robustness. In most of the parameter sets, similar results were derived as detailed in the results section ([S3 Appendix](#)).

**Individual probability of changing state.** As the distribution of the state latencies corresponded to an exponential distribution ([S2 Fig](#)), the probability of an individual changing its state was the log gradient of this exponential distribution, that is, the inverse of the mean state latency [[17](#)]:

$$\Psi_{1,s} = \sum_{i=1}^N \lambda_{i,s}$$

**Table 1. The explanation and values of parameters.**

| parameter            | value (resting) | value (moving) | Definition                                                                                                                                                                        |
|----------------------|-----------------|----------------|-----------------------------------------------------------------------------------------------------------------------------------------------------------------------------------|
| $a_{ki}$             | social network  |                | social network weight between individuals $k$ and $i$ .                                                                                                                           |
| $C$                  | 0.426           | 0.796          | mimetic coefficient                                                                                                                                                               |
| $\Psi_1$             | 0.030           | 0.040          | A probability of starting resting/moving. Equal to $N\lambda_i$                                                                                                                   |
| $\Psi_j$             | -               | -              | Probability per unit time that one of the $n$ agents became the $j$ th joiner (corresponding to the hypothesis where the identities of individuals are not taken into an account) |
| $\Psi_{i,s}$         | -               | -              | Probability per unit time of an individual $i$ changing the state $s$ (the refractory time period and the identities of individuals are taken into an account.)                   |
| $\lambda_{i,s}$      | 0.00016         | 0.00033        | The average probability per unit time of an individual $i$ changing the state $s$ .                                                                                               |
| $\Delta T_{01,s}$    | 50 (min)        | 25 (min)       | Refractory time period. time elapsed from the end of the previous event.                                                                                                          |
| $\Delta T_{j,j-1,s}$ | 2.3 (min)       | 1.3 (min)      | time elapsed between the state change of the joiner $j-1$ and the state change of the joiner $j$ . The inverse of $C$ .                                                           |
| $\Delta t_i$         | -               | -              | time elapsed from the previous state change of individual $i$                                                                                                                     |
| $N$                  | 123             |                | number of individuals in a herd                                                                                                                                                   |
| $n_s$                | -               | -              | Number of the individuals in the state $s$ (resting/moving).                                                                                                                      |

See also supplementary Table for the detailed explanation of how to obtain the parameter value. ‘-’ means that the value can change dynamically.

The value of the parameter was written when it was a constant.

<https://doi.org/10.1371/journal.pone.0258944.t001>

It was assumed that all individuals may have the same mean latency, while their probability of changing their state might differ. The mean latencies to start an event are equal irrespective of the individual:

$$\Delta T_{01,s} = \frac{1}{\Psi_{01,s}}$$

As explained above,  $\Delta T_{01}$  was also defined as a refractory time period in the simulations.

**Mimetic coefficient.** In a mimetic process where the probability of changing state is proportional to the number of individuals already in this state, the probability per unit time that individual  $i$  changes state is as follows:

$$\psi_{i,s} = \lambda_s + Cn_s$$

where  $C$  is the mimetic coefficient per individual and  $j_s$  is the number of individuals in state  $s$ , either R for resting or M for moving. As  $\psi_i$  was the same for all the individuals in the herd, the mimetic coefficient  $C$  could be obtained from the inverse of the average  $T_{j,j-1}$ ,  $1/E[\Delta T_{j,j-1}]$  ( $j = 2,3, \dots$ ). The parameters  $C$  and  $\Delta T_{01}$  were calculated using survival analysis (S2 and S3 Figs, respectively) and quadratic functions (see results and Figs 5 and 6).

**Models based on the different hypotheses.** Different sub-models (Fig 1) were tested based on each hypothesis, presented here for i to iii. Overall, seven models were tested: (A) independent, (Ba) absolute anonymous, (Bb) proportional anonymous, (Ca) unit-level absolute social, (Cb) unit-level proportional social, (Da) herd-level absolute social, and (Db) herd-level proportional social model.

(i) *Independent hypothesis (model A)*. The first hypothesis assumed that horses were independent: the probability of an individual changing their state is not influenced by the state of any other members. Under this hypothesis, the probability that one of the agents (e.g., individual  $i$ ) changes state per unit time was  $\lambda_{i,s}$ . Considering the refractory period, the probability  $\psi_i$  is equal to  $\lambda = \Psi_{01}/N$  when  $\Delta t_i < \Delta T_{01,s}$  and is equal to 1 when  $\Delta t_i = \Delta T_{01,s}$ . This model corresponds to a null model.



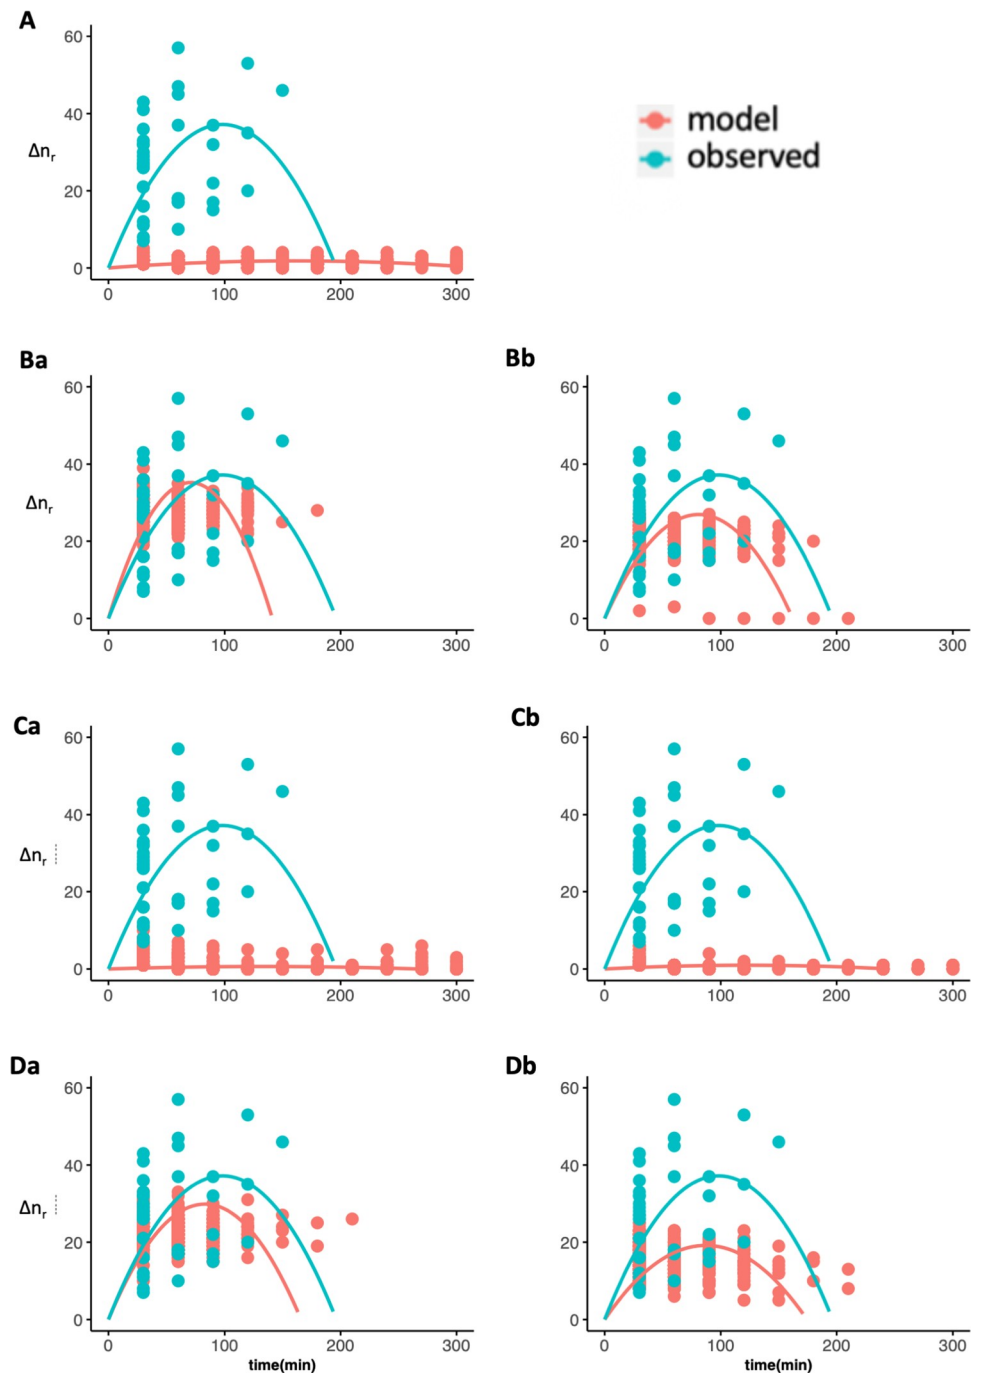

**Fig 5. The change of the number of resting individuals in  $P_{m,r}$ .** The pink points are data obtained from simulation and blue are those from the observation. Data were fitted to a quadratic function that crosses (0,0), i.e.,  $ax^2+bx$ .  $R^2$  is the coefficient of determination of the regression for simulated data. Aa: independent, Ba: absolute anonymous, Bb: proportional anonymous, Ca: unit-level absolute social, Cb: unit-level proportional social, Da: herd-level absolute social, and Db: herd-level proportional social models.

<https://doi.org/10.1371/journal.pone.0258944.g005>

(ii) *Anonymous hypotheses (model Ba and Bb).* The second hypothesis specified that horses synchronize with all the herd members anonymously. In the absolute anonymous model (model Ba), individuals will change state  $s$  according to the absolute (i.e., not proportional)

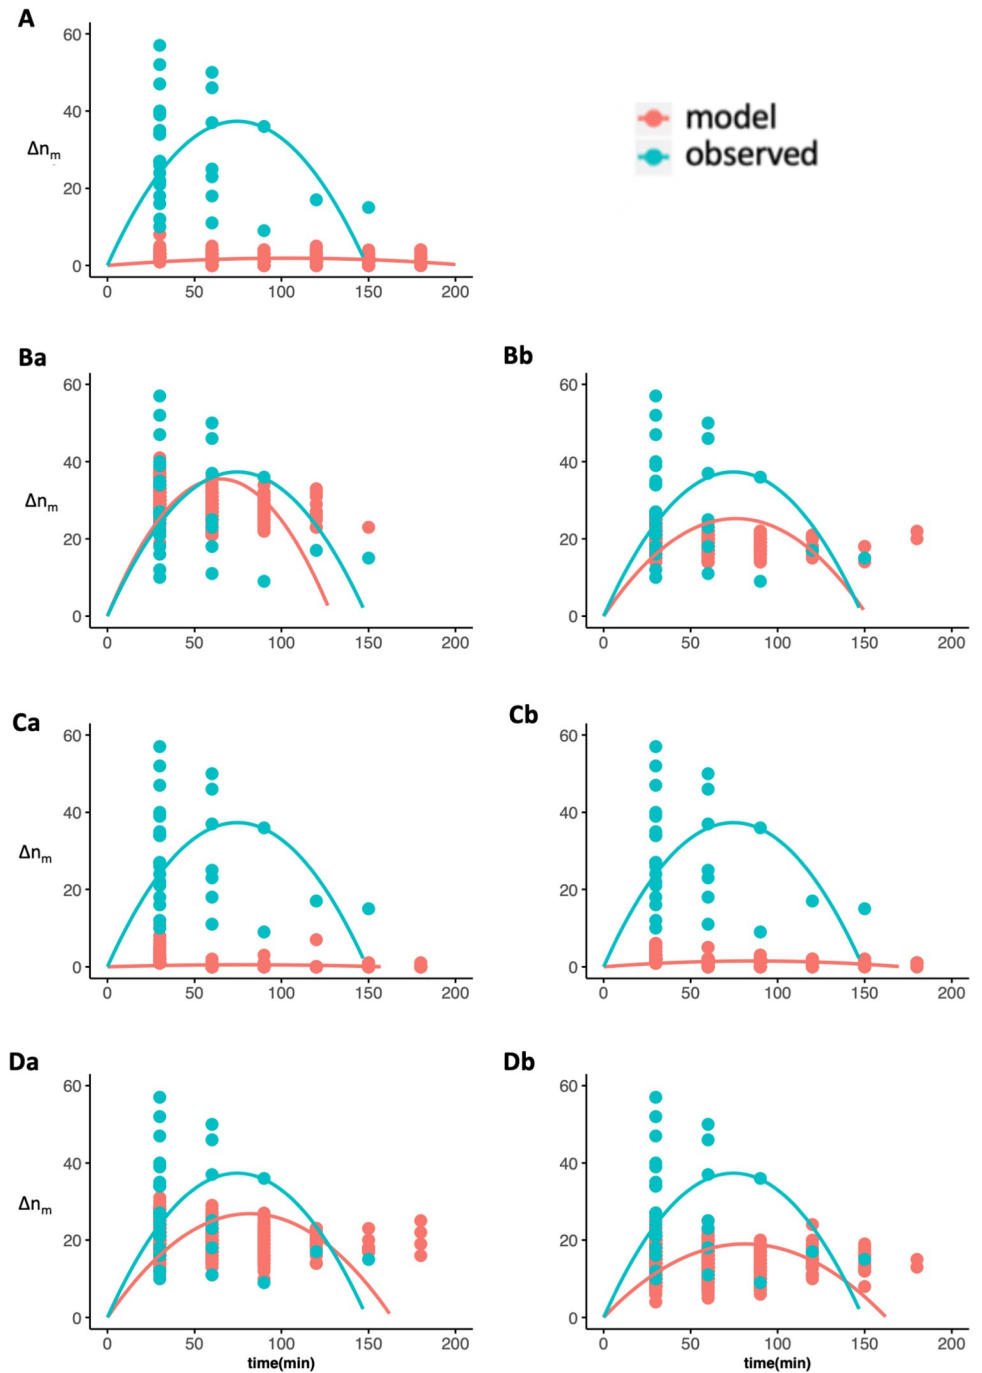

**Fig 6.** The change in the number of resting individuals in  $P_{r,m}$ . Same as Fig 5.

<https://doi.org/10.1371/journal.pone.0258944.g006>

number of herd members in that state (number R for state r and number M for state m). To test this hypothesis, a mimetic coefficient C was added in the independent model, which indicated the strength of the collective process.

Considering the refractory time period, the probability that one of  $n$  agents became the joiner  $j+1$  in state  $s$  under the model Ba was obtained from the following equation:

$$\psi_{i,s} = \min \left\{ \frac{1}{\Delta T_{01,s} - \Delta t_i}, \lambda_s + C n_s \right\}$$

when  $\Delta t_i < \Delta T_{01,s}$ . It is equal to 1 when  $\Delta t_i = \Delta T_{01,s}$  (this is the same for all the models; hence, we only refer to the probability when  $\Delta t_i < \Delta T_{01,s}$ ). The equation shows that when  $\Delta t_i$  is small, that is, soon after an individual changed its state (beginning of a refractory period), it is less likely to be influenced by other individuals' states.

Another model was created based on the proportional number of individuals in state  $s$ , where the probability of changing state  $s1$  depended on the number of individuals in state  $s1$  divided by the number of individuals in state  $s2$  (model Bb). The probability of individuals in  $s2$  to go in state  $s1$  is as follows:

$$\psi_{i,s1} = \min \left\{ \frac{1}{\Delta T_{01,s1} - \Delta t_i}, \lambda_{s1} + C \frac{n_{s1}}{n_{s2}} \right\}$$

As  $n_{s1} = N - n_{s2}$ , the response of individuals become reciprocal, not linear like the anonymous model.

(iii) *Social hypothesis (model Ca, Cb, Da, and Db)*. In these hypotheses, the influence of the social relationships between units or herd members on the decision to join was tested. The unit-level social hypothesis (model Ca and Cb) assumed the synchrony happened only among unit members, while the herd-level social hypothesis (models Da and Db) considered both intra- and inter-unit sociality. Within these two social hypotheses, two models were tested: one taking the absolute numbers of individuals in each state (model Ca and Da), and the other taking the proportion as described for the anonymous mimetic models (Cb and Db).

Models Ca and Da considered the individual identities and the social relationships of each dyad. Each observed social relationship of the study herd was implemented in the model, allowing the consideration of differences in social relationships between dyads. The probability per unit time that one of the  $n_{s2}$  individuals would change the state to  $n_{s1}$  differed inversely between the resting agents with respect to their social relationships with agents already in  $s1$ . The probability of an individual  $i$  to change state under the social hypothesis was as follows:

$$\psi_{i,s} = \min \left\{ \frac{1}{\Delta T_{01,s} - \Delta t_i}, \lambda_s + C \sum_{k \in s, k \neq i} a_{ik} \right\}$$

where  $k \in s$  means that individual  $k$  is in state  $s$ . We simulated two types of the social index  $a_{ik}$ : 'unit-level' (only intra-unit) in model Ca, and 'herd-level' (both intra- and inter-unit) association network in the model Da to investigate whether individuals made decisions based only on the members of the same unit or on all herd individuals.

In models Cb and Db, the proportion of the joiner to the non-joiner mattered. The probability of an individual  $i$  becoming a joiner  $j+1$  under the social hypothesis was as follows:

$$\psi_{i,s1} = \min \left\{ \frac{1}{\Delta T_{01,s1} - \Delta t_i}, \lambda_{s1} + C \frac{\sum_{k \in s1, k \neq i} a_{ik}}{\sum_{k \in s2, k \neq i} a_{ik}} \right\}$$

**Model setup.** At the group level, the collective state  $S(t)$  can be described at time  $t$  by the number  $n_m$  of individuals moving at that time (for a given group size  $N$ , the number  $n_r$  of resting individuals is always  $N - n_m$ ).

The number of individuals, individual identities, and social relationships of the observed herd were included in the model. Thus, the number of agents  $N$  was fixed to 123. The model is time-dependent with each time-step representing one minute. At the start of the simulation, 30% of the agents were resting ( $n_r = 37$ ). This 30% was derived from the average percentage of resting horses through observation. This value was consistent with the other studies of feral horses [44]. The probability of changing state  $\lambda_i$  of each agent was implemented. The present study did not implement any ecological barriers in the model, as the horses usually foraged in a flat area with almost no obstacles (i.e., trees or rocks).

### (e) Statistical analyses

To evaluate the model fit, this study compared the number of horses changing states and the synchronization rate of simulated data to those of observed data.

For both  $P_{m:r}$  and  $P_{r:m}$ , the number of individuals which changed state after the synchronization phase started in each 30-minute window (e.g. 0–30, 30–60, 60–90 min. . .) was plotted. We refer to this number as  $\Delta n_s$  ( $\Delta n_r$  is for  $P_{m:r}$  and  $\Delta n_s$  for  $P_{r:m}$ ). The observed data were fitted to a quadratic function that crosses (0,0), that is,  $ax^2 + bx$ , using linear regression in the R environment. The models were evaluated by comparing the simulated data to observed data using the Kolmogorov-Smirnov (K-S) test.

The correlation between the synchronization rate per dyad of simulated data and that of observed data was calculated, and its significance was tested using the Mantel and K-S tests. The similarity of the intra-unit synchronization rate distribution was evaluated to that of the observed data using the K-S test. The Mantel test was used to evaluate the similarity of the synchronization rate matrix as a whole, especially the ratio of intra- and inter-unit synchronization rate. Indeed, the synchronization rate across units were mostly the same among models and never became better than independent; therefore, it was eliminated from the evaluation. A Mantel test was performed using the R package ‘vegan’ [45] and K-S tests were performed using the function ‘ks.test’ in the R environment.

Horses live in a multilevel society and are therefore expected to show social cohesion and behavioural synchronization. It was thus expected that the mimetic model, either anonymous or social, would do better than the independent model (model Aa). Thus, the model Aa was defined as a null model and other models were compared to the same. A score for each model was calculated, defined as the proportion of the model showing better results than the independent one, that is, when the model had lower  $D$  in K-S tests and higher  $r$  in Mantel tests than those of the independent model. As we had four tests, the score takes a value, 0, 0.25, 0.5, 0.75, or 1.0, where 1.0 is regarded the best.

## Results

### (a) Empirical data

The average number of individuals changing states are shown in Figs 4 ( $P_{m:r}$ ) and 5 ( $P_{r:m}$ ) (in blue, repeated in all graphs for comparison). Both showed a positive correlation with the quadratic function (adjusted  $R^2 = 0.79$  in  $P_{m:r}$ ,  $R^2 = 0.81$  in  $P_{r:m}$ , see S1 Table for the detailed results), indicating a mimetic or synchronization process with an increase of the number of horses in a state followed by a decrease [13, 17].

The average  $\pm$  SD synchronization rate of each pair was  $0.93 \pm 0.03$  within unit and  $0.63 \pm 0.06$  across units in the observed data, which showed a strong synchronization based on

the social network of horses. The correlation of the social network and synchronization rate of observed data was 0.69 (Mantel test, permutation: 9999,  $p < 0.001$ ), indicating a synchronization process based on social relationships, but a part of the process (at least 31%) was not based on these relationships.

The average  $\pm$  SD weight within and across units was  $19.4 \pm 9.9$  and  $0.26 \pm 0.85$ , respectively. This suggests that the same unit members had around 75.9 times stronger effects on the behaviour than horses from different units in the herd-level hypothesis, and as units are mixed (different ages, sex, and personality), other hypotheses (sex, age, and personality tested separately from the network) are not relevant compared to the social network which embeds these sociodemographic variables.

### (b) Simulations

Concerning the states' synchronization, four models showed parabolic shape correlated to observed data (Table 2) in the moving to resting phase (absolute anonymous: Fig 5Ba, proportional anonymous: 5Bb, herd level absolute social: 5Da, and herd-level proportional social: 5Db) and resting to moving phase (absolute anonymous: Fig 6Ba, proportional anonymous: 6Bb, herd level absolute social: 6Da, and herd-level proportional social: 6Db). Agents merely changed their states in the other three models (independent: Figs 5A and 6A, unit-level absolute social: 5Ca and 6Ca, and unit-level proportional social: 5Cb and 6Cb).

Fig 7 shows the comparison between model-generated synchronization scores and synchronization scores from the empirical data. The model simulations that did not consider social relationships (i.e., independent, absolute anonymous, and proportional anonymous models) showed a lot of overlap in the histograms of intra-unit and inter-unit synchronization scores, unlike the observed data, which show clear separation between intra and inter-unit synchronization scores (Fig 7).

Overall, the herd-level social (model Da) and proportional social (model Db) always had better scores than the independent (null) model, while the others did not. The K-S tests for  $\Delta n_m$  and  $\Delta n_r$  were better in the herd-level social model, and the K-S test and the Mantel test were better in the herd-level proportional social model (Table 2).

### Discussion

The present study compared seven models to find one that best explained the dynamics of behavioural states, specifically the synchronization of resting versus movement, in horses'

**Table 2. The result of the evaluation of  $\Delta n$  and the synchronization rate obtained from the simulations.**

| model                          |    | K-S test ( $\Delta n_m, P_{r,m}$ ) |        |      | K-S test ( $\Delta n_r, P_{m,r}$ ) |        |      | K-S test (sync rate of intra-unit) |        |      | Mantel test (sync rate) |        |      | score       |
|--------------------------------|----|------------------------------------|--------|------|------------------------------------|--------|------|------------------------------------|--------|------|-------------------------|--------|------|-------------|
|                                |    | D                                  | p      | eval | r                                  | p      | eval | D                                  | p      | eval | r                       | P      | eval |             |
| Independent (null model)       | A  | 0.980                              | 0.010  |      | 0.980                              | 0.010  |      | 1.000                              | <0.001 |      | 0.367                   | 0.010  |      |             |
| absolute anonymous             | Ba | 0.215                              | 0.989  | +    | 0.306                              | 0.989  | +    | 1.000                              | <0.001 | -    | -0.050                  | 0.989  | -    | <b>0.50</b> |
| proportional anonymous         | Bb | 0.564                              | 0.947  | +    | 0.561                              | 0.947  | +    | 1.000                              | <0.001 | -    | -0.057                  | 0.947  | -    | <b>0.50</b> |
| unit-level absolute social     | Ca | 0.993                              | <0.001 | -    | 0.995                              | <0.001 | -    | 0.973                              | <0.001 | +    | 0.572                   | <0.001 | +    | <b>0.50</b> |
| unit-level proportional social | Cb | 0.980                              | <0.001 | -    | 0.980                              | <0.001 | -    | 0.993                              | <0.001 | +    | 0.627                   | <0.001 | +    | <b>0.50</b> |
| herd-level absolute social     | Da | 0.537                              | <0.001 | +    | 0.577                              | <0.001 | +    | 0.915                              | <0.001 | +    | 0.601                   | <0.001 | +    | <b>1</b>    |
| herd-level proportional social | Db | 0.698                              | <0.001 | +    | 0.714                              | <0.001 | +    | 0.714                              | <0.001 | +    | 0.634                   | <0.001 | +    | <b>1</b>    |

"Eval" (evaluation) is "+" when the result is better than the independent model and "-" when not. The model with smaller D and larger r is considered as better. Score is the percentage of the tests which showed better results than the independent (null) model.

<https://doi.org/10.1371/journal.pone.0258944.t002>

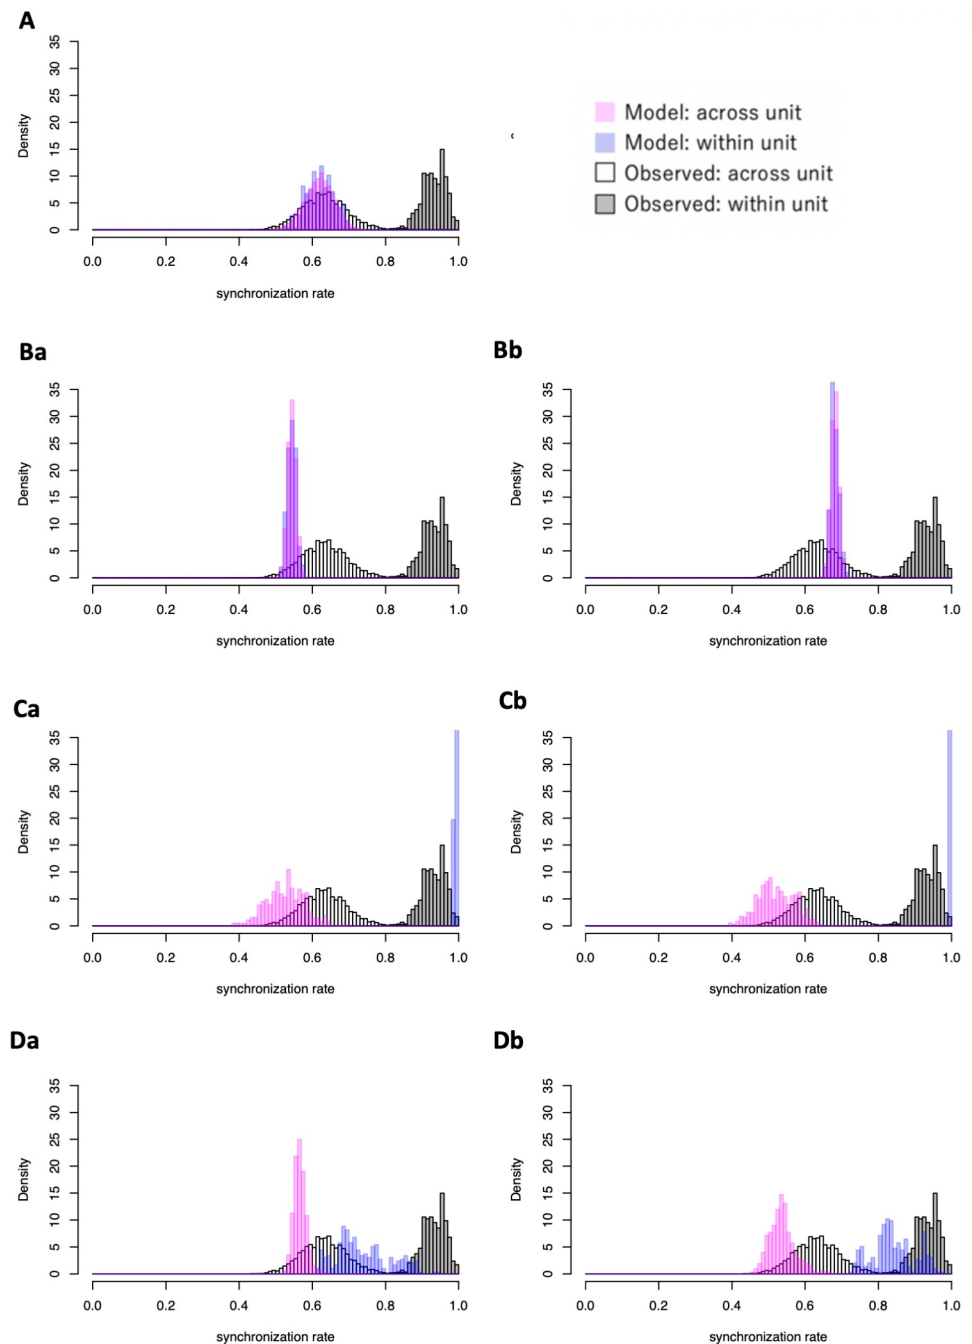

**Fig 7. Histograms of the synchronization rate.** White and grey bars represent the observed value of synchronization rate across units and within units, respectively. Pink and blue bars represent those of the simulated data across units and within units, respectively. The name of the models is same as in Fig 5.

<https://doi.org/10.1371/journal.pone.0258944.g007>

multilevel society. Among the models tested, only the herd-level absolute social model (model Da) and the herd-level proportional social model (model Db) matched the empirical data better than the null model (model A). Considering the simplicity of the model, which does not contain any environmental effects and temporal changes of agents' positions, and the fact that the model is based on temporally sparse data with 30-minute intervals, we argue that these two

models were quite fitted to the empirical data. These models indicate that synchronization in a multilevel society of horses can be largely explained by their internal rhythm plus the social network. Model Da (herd-level absolute) was better at explaining the number of horses changing states, while model Db (herd-level proportional) was more successful at explaining the synchronization rate distribution; thus, the mechanism most likely lies somewhere between them (for instance, these two mechanisms switch at a certain threshold). It is also possible that the fitness of the two models could not be evaluated with sufficient accuracy because of the sparsely observed data. Although a multilevel society is considered among the most complex social structures in animals [22], this study suggested that the collective behavioural pattern could be represented by simple mathematical models.

The observation data had higher intra- and inter-unit synchronization rate, and the number of individuals that change state after the synchronization phase started ( $\Delta n_r$  and  $\Delta n_m$ ) had a higher peak than those of the herd-level hypothesis (models Da and Db) in most of the parameter sets. The  $\Delta n_s$  represents the speed of the behaviour spread, and synchronization rate corresponds to the stability of the state (e.g., whether horses keep resting when many individuals are resting), suggesting that both are stronger in the observed data than those in simulation. According to the models with different parameter sets, the fitness to  $\Delta n_s$  value and to the synchronization rate was negatively correlated with each other, suggesting the trade-off between them (S3 Appendix). Indeed, the higher the speed of synchronization, the lower the stability. To further improve the fitness of the model, parameter sets and/or equations which establish compatibility between speed and stability may need to be considered. For example, in the current model, a shorter refractory time period could enhance the speed but lower the stability, because agents will definitely wake up after the refractory time passes. We may need to either change the equation of the refractory time period or enhance the speed without changing the refractory time period.

Most previous studies of non-multilevel societies suggested local interaction within a few body lengths or the several nearest neighbours [3]. However, the result from this study showed that inter-individual interaction also occurred among spatially separated individuals. According to [29], the average nearest unit distance was 39.3m (around 26.2 times a horse's body length) and the nearest individual within the same unit was 3.2m. It is still unclear whether horses have a global view or if they just respond to the several nearest units; however, this is a notably large distance compared to other studies. Horses usually do not create any significant cue (e.g., vocalization) when they start moving/resting; thus, it is likely that horses have an ability to recognize the behaviour of horses of both the same and other units simultaneously. In a multilevel society, it is important to keep the inter-unit distance moderate. This avoids competition between units while keeping the cohesion of the higher-level group to obtain the benefits of being in a large group, such as protection from bachelors or predators [24], and may have led to the evolution of such cognitive abilities.

Besides the temporal positions of units, another factor which may be important is the individual and unit attributes. The integration of the network in the model already considered individual differences in network connectedness and centrality caused by such variations in attributes. In the intra-unit level, some individual characteristics could affect the leaderships of collective departure in a multilevel society (lactation: [46]; personality: [19]; intra-unit dominance rank: [14, 47]), but it is unclear if those factors affect the behavioural propagation in the herd level (but see [46]). We presume most of these individual-level attributes would become less effective in inter-unit level synchronization because each unit has individuals with a different status, and the synchronization inside units are far stronger than those across units. In herd-level synchronization, it may be assumed that all individuals in the same units always perform the same behaviour (all resting or all moving); thus, individual differences should be

largely diluted. However, it is still possible that a unit-level social status exists and affects the synchronization pattern. In this horse population, our previous study found that large harems tend to occupy the centre and had higher strength centrality (the sum of the edge that connects to a node), while small harems and AMUs stayed on the periphery, suggesting the existence of inter-unit level dominance rank [29]. It may therefore be possible that such dominant units are more influential. Our data were too sparse in time scale to observe how behaviour propagate across units and include horses' positional dynamics in a model, which is needed to investigate horses' recognizable distance and the effect of the attributes. Finer-scaled observation will be needed for further investigation on the underlying mechanism in herd-level synchronization.

Because of the simplicity of the model, the present methodology is highly applicable to other species. The spatial structure of multilevel societies is still poorly understood, but it may vary among species, habitat environments, and contexts. For example, a migrating herd of Przewalski's horses (*Equus ferus przewalskii*) was relatively aggregated [48], but a higher-level group of Peruvian red uakari (*Cacajao calvus*) was much more sparsely distributed, similar to the horses in this study (the nearest unit distance was 10–15m or more) [30]. It is also highly possible that other species forming multilevel societies show an ability to recognize the behaviour of other units which are located far away (especially in species that live in open fields, such as equines and cetaceans). Horses do not have specific timing for resting, and it is unlikely that all individuals sleep at the same time. Thus, to test whether agents only perceive units nearby, a formula representing collective movement needed to be added in the current model. However, some animals that form multilevel societies, such as primates, often sleep together at the same location at night [20]. In that case, the movement need not be considered, making it easier to test the range of their perception. It is important to discover whether the association index could also explain the behavioural decisions of other multilevel social animals with various special structures to generalize our knowledge of behavioural synchronization in multilevel societies.

Overall, this study provides new insights into the behavioural synchronization process and contributes to the understanding of collective behaviours in complex animal societies. The organization of multilevel societies has become a topic of great interest recently, but studies have so far tended to focus on social relationships, and many questions remain unresolved. It is hoped that this study on collective synchronization will contribute to an understanding of the evolution and functional significance of multi-level animal societies.

### Limitations of the study

Our model could not consider the temporal changes in the position of horses, including concurrent inter-individual and inter-group distances, although it is highly likely that the behaviour of units is more affected by closer units. While horses are in the moving state, their movement is likely to be synchronized with each other; hence, movement synchronization as well as behavioural state synchronization may need to be considered in a model. Inter-individual and intergroup distances can be developed in the model indirectly through giving variance using stochasticity to relationships implemented in the model. For calculating the parameter on stochasticity, more temporally fine-scaled data may be needed. Orthomosaic data have the advantage of obtaining accurate and identified positions of individuals in a wide-ranged group, but it obtains only temporally sparse data. Optimizing the data collection method, such as a combination of the video recording from drones and orthomosaics, is needed to further develop the model. In addition, the variations of parameter sets tested in this study were limited, making it difficult to hold a detailed discussion on the function of the parameters.



## Supporting information

### **S1 Appendix. Reliability test of behavioural identification from drones.**

(PDF)

### **S2 Appendix. The effect of time on the horses' behavioural state.**

(PDF)

### **S3 Appendix. Comparisons of models under various parameters.**

(PDF)

**S1 Table. The result of the regression analysis of  $\Delta ns$  in observed data.** Data was fitted to quadratic function that cross (0,0), i.e.  $ax^2+bx$ .

(DOCX)

**S1 Fig. The number of observations per day and unit availability.** The orange cells indicate the day we used in the analysis.

(PDF)

**S2 Fig.** Survival analysis to obtain (a)  $\Delta T_{01,m}$  and (b)  $\Delta T_{01,r}$ . The data was fitted to exponential curve. The absolute value of the exponent is considered as the inverse of  $\Delta T_{01,s}$  (minutes).

(PDF)

**S3 Fig.** Survival analysis to obtain mimetic coefficient C for (a)  $P_{r,m}$  and (b)  $P_{m,r}$ . The data was fitted to exponential curve. The absolute value of the exponent is considered as C, which is the inverse of  $\Delta T_{j,j+1,s}$  (minutes).

(PDF)

## Acknowledgments

The authors are grateful to Viana do Castelo city and villagers in Montaria for supporting us and for their hospitality during our stay. We thank Monamie Ringhofer, Sakiho Ochi, Pandora Pinto, Renata Mendonça, Sota Inoue, Carlos Pereira and Tetsuro Matsuzawa for their great help with this project. Cédric Sueur is a junior member of Academic Institute of France. Version 3 of this preprint has been peer-reviewed and recommended by Peer Community in Network Science (<https://doi.org/10.24072/pci.networksci.100001>)

## Author Contributions

**Conceptualization:** Tamao Maeda, Cédric Sueur, Satoshi Hirata, Shinya Yamamoto.

**Data curation:** Tamao Maeda, Cédric Sueur.

**Formal analysis:** Tamao Maeda, Cédric Sueur.

**Funding acquisition:** Tamao Maeda, Satoshi Hirata, Shinya Yamamoto.

**Investigation:** Tamao Maeda, Cédric Sueur.

**Methodology:** Tamao Maeda, Cédric Sueur, Satoshi Hirata, Shinya Yamamoto.

**Project administration:** Tamao Maeda, Satoshi Hirata, Shinya Yamamoto.

**Supervision:** Cédric Sueur, Satoshi Hirata, Shinya Yamamoto.

**Validation:** Tamao Maeda.

**Visualization:** Tamao Maeda.

**Writing – original draft:** Tamao Maeda.

**Writing – review & editing:** Cédric Sueur, Satoshi Hirata, Shinya Yamamoto.

## References

1. Duranton C, Gaunet F. Behavioural synchronization from an ethological perspective: Overview of its adaptive value. *Adaptive Behavior*. SAGE Publications Ltd; 2016. pp. 181–191. <https://doi.org/10.1177/1059712316644966>
2. Couzin ID. Synchronization: The Key to Effective Communication in Animal Collectives. *Trends in Cognitive Sciences*. Elsevier Ltd; 2018. pp. 844–846. <https://doi.org/10.1016/j.tics.2018.08.001> PMID: 30266143
3. Couzin ID, Krause J. Self-Organization and Collective Behavior in Vertebrates. *Adv Study Behav*. 2003; 32: 1–75. [https://doi.org/10.1016/S0065-3454\(03\)01001-5](https://doi.org/10.1016/S0065-3454(03)01001-5)
4. Bonenfant C, Loe LE, Mysterud A, Langvatn R, Stenseth NC, Gaillard JM, et al. Multiple causes of sexual segregation in European red deer: Enlightenments from varying breeding phenology at high and low latitude. *Proc R Soc B Biol Sci*. 2004; 271: 883–892. <https://doi.org/10.1098/rspb.2003.2661> PMID: 15255042
5. Mooring MS, Reisig DD, Osborne ER, Kanallakan AL, Hall BM, Schaad EW, et al. Sexual segregation in bison: A test of multiple hypotheses. *Behaviour*. 2005; 142: 897–927. <https://doi.org/10.1163/1568539055010110>
6. Kastberger G, Schmelzer E, Kranner I. Social Waves in Giant Honeybees Repel Hornets. *PLoS One*. 2008; 3: 3141. <https://doi.org/10.1371/journal.pone.0003141> PMID: 18781205
7. Ancel A, Beaulieu M, Le Maho Y, Gilbert C. Emperor penguin mates: Keeping together in the crowd. *Proc R Soc B Biol Sci*. 2009; 276: 2163–2169. <https://doi.org/10.1098/rspb.2009.0140> PMID: 19324739
8. McIntosh D. Spontaneous facial mimicry, liking and emotional contagion. *Polish Psychol Bull*. 2006; 37: 31–42.
9. King AJ, Sueur C, Huchard E, Cowlishaw G. A rule-of-thumb based on social affiliation explains collective movements in desert baboons. *Anim Behav*. 2011; 82: 1337–1345. <https://doi.org/10.1016/j.anbehav.2011.09.017>
10. Bialek W, Cavagna A, Giardinà I, Mora T, Pohl O, Silvestri E, et al. Social interactions dominate speed control in poising natural flocks near criticality. *Proc Natl Acad Sci U S A*. 2014; 111: 7212–7217. <https://doi.org/10.1073/pnas.1324045111> PMID: 24785504
11. Torney CJ, Lamont M, Debell L, Angohiatok RJ, Leclerc LM, Berdahl AM. Inferring the rules of social interaction in migrating caribou. *Philos Trans R Soc B Biol Sci*. 2018; 373: 20170385. <https://doi.org/10.1098/rstb.2017.0385> PMID: 29581404
12. Centola D. The spread of behavior in an online social network experiment. *Science (80-)*. 2010; 329: 1194–1197. <https://doi.org/10.1126/science.1189910> PMID: 20813951
13. Sueur C, Deneubourg JL. Self-Organization in Primates: Understanding the Rules Underlying Collective Movements. *Int J Primatol*. 2011; 32: 1413–1432. <https://doi.org/10.1007/s10764-011-9520-0>
14. Papageorgiou D, Farine DR. Shared decision-making allows subordinates to lead when dominants monopolize resources. *Sci Adv*. 2020; 6: 5881–5906. <https://doi.org/10.1126/sciadv.aba5881> PMID: 33239284
15. Sueur C, Deneubourg JL, Petit O. From the first intention movement to the last joiner: Macaques combine mimetic rules to optimize their collective decisions. *Proc R Soc B Biol Sci*. 2011; 278: 1697–1704. <https://doi.org/10.1098/rspb.2010.2084> PMID: 21084348
16. King AJ, Douglas CMS, Huchard E, Isaac NJB, Cowlishaw G. Dominance and Affiliation Mediate Despotism in a Social Primate. *Curr Biol*. 2008; 18: 1833–1838. <https://doi.org/10.1016/j.cub.2008.10.048> PMID: 19026539
17. Sueur C, Petit O, Deneubourg JL. Selective mimetism at departure in collective movements of Macaca tonkeana: an experimental and theoretical approach. *Anim Behav*. 2009; 78: 1087–1095. <https://doi.org/10.1016/j.anbehav.2009.07.029>
18. Sueur C, Deneubourg JL, Petit O. From social network (centralized vs. decentralized) to collective decision-making (unshared vs. shared consensus). *PLoS One*. 2012; 7. <https://doi.org/10.1371/journal.pone.0032566> PMID: 22393416
19. Briard L, Dorn C, Petit O. Personality and Affinities Play a Key Role in the Organisation of Collective Movements in a Group of Domestic Horses. *Ethology*. 2015; 121: 888–902. <https://doi.org/10.1111/eth.12402>

20. Grueter CC, Matsuda I, Zhang P, Zinner D. Multilevel societies in primates and other mammals: Introduction to the special issue. *Int J Primatol.* 2012; 33: 993–1001. <https://doi.org/10.1007/s10764-012-9614-3> PMID: 23024443
21. Grueter CC, Qi X, Zinner D, Bergman T, Li M, Xiang Z, et al. Multilevel Organisation of Animal Sociality. *Trends in Ecology and Evolution.* Elsevier Ltd; 2020. <https://doi.org/10.1016/j.tree.2020.05.003> PMID: 32473744
22. Grueter CC, Qi X, Li B, Li M. Multilevel societies. *Curr Biol.* 2017; 27: 984–986. <https://doi.org/10.1016/j.cub.2017.06.063> PMID: 28950088
23. Qi XG, Garber PA, Ji W, Huang ZP, Huang K, Zhang P, et al. Satellite telemetry and social modeling offer new insights into the origin of primate multilevel societies. *Nat Commun.* 2014;5. <https://doi.org/10.1038/ncomms6296> PMID: 25335993
24. Swedell L, Plummer T. A papionin multilevel society as a model for hominin social evolution. *Int J Primatol.* 2012; 33: 1165–1193. <https://doi.org/10.1007/s10764-012-9600-9>
25. Papageorgiou D, Christensen C, Gall GEC, Klarevas-Irby JA, Nyaguthii B, Couzin ID, et al. The multi-level society of a small-brained bird. *Curr Biol.* 2019; 29: R1120–R1121. <https://doi.org/10.1016/j.cub.2019.09.072> PMID: 31689393
26. Schreier AL, Swedell L. The fourth level of social structure in a multi-level society: Ecological and social functions of clans in *Hamadryas Baboons*. *Am J Primatol.* 2009; 71: 948–955. <https://doi.org/10.1002/ajp.20736> PMID: 19670312
27. Ozogány K, Vicsek T. Modeling the Emergence of Modular Leadership Hierarchy During the Collective Motion of Herds Made of Harems. *J Stat Phys.* 2014; 158: 628–646. <https://doi.org/10.1007/s10955-014-1131-7>
28. Snyder-Mackler N, Beehner JC, Bergman TJ. Defining Higher Levels in the Multilevel Societies of *Geladas* (*Theropithecus gelada*). *Int J Primatol.* 2012; 33: 1054–1068. <https://doi.org/10.1007/s10764-012-9584-5>
29. Maeda T, Ochi S, Ringhofer M, Sosa S, Sueur C, Hirata S, et al. Aerial drone observations identified a multilevel society in feral horses. *Sci Rep.* 2021; 11: 71. <https://doi.org/10.1038/s41598-020-79790-1> PMID: 33420148
30. Bowler M, Knogge C, Heymann EW, Zinner D. Multilevel societies in new world primates? Flexibility may characterize the organization of Peruvian red uakaris (*Cacajao calvus ucayalii*). *Int J Primatol.* 2012; 33: 1110–1124. <https://doi.org/10.1007/s10764-012-9603-6> PMID: 23024445
31. Rubenstein DI, Hack M. Natural and sexual selection and the evolution of multi-level societies: insights from zebras with comparisons to primates. *Sexual selection in primates: New and comparative perspectives.* 2004. pp. 266–279. <https://doi.org/10.1017/CBO9780511542459.017>
32. Sueur C, King AJ, Conradt L, Kerth G, Lusseau D, Mettke-Hofmann C, et al. Collective decision-making and fission-fusion dynamics: A conceptual framework. *Oikos.* 2011; 120: 1608–1617. <https://doi.org/10.1111/j.1600-0706.2011.19685.x>
33. Moscovice LR, Sueur C, Aureli F. How socio-ecological factors influence the differentiation of social relationships: An integrated conceptual framework: Differentiation of social relationships. *Biol Lett.* 2020;16. <https://doi.org/10.1098/rsbl.2020.0384> PMID: 32933407
34. Inoue S, Yamamoto S, Ringhofer M, Mendonça RS, Pereira C, Hirata S. Spatial positioning of individuals in a group of feral horses: a case study using drone technology. *Mammal Res.* 2019; 64: 249–259. <https://doi.org/10.1007/s13364-018-0400-2>
35. Charpentier M, Pelé M, Renoult J, Sueur C. Social data collection and analyses. In: Salguero-Gómez R, Gamelon M, editors. *Demographic methods across the tree of life.* Oxford, UK: Oxford University Press; 2021.
36. Schroeder NM, Panebianco A, Musso RG, Carmanchahi P. An experimental approach to evaluate the potential of drones in terrestrial mammal research: A gregarious ungulate as a study model. *R Soc Open Sci.* 2020;7. <https://doi.org/10.1098/rsos.191482> PMID: 32218965
37. Ringhofer M, Inoue S, Mendonça RS, Pereira C, Matsuzawa T, Hirata S, et al. Comparison of the social systems of primates and feral horses: data from a newly established horse research site on Serra D'Arga, northern Portugal. *Primates.* 2017; 58: 479–484. <https://doi.org/10.1007/s10329-017-0614-y> PMID: 28585062
38. Wand MP. Data-Based Choice of Histogram Bin Width. *Am Stat.* 1997; 51: 59–64. <https://doi.org/10.1080/00031305.1997.10473591>
39. Wand M. Package 'KernSmooth.' 2015 [cited 31 May 2019]. Available: <https://cran.r-project.org/web/packages/KernSmooth/index.html>
40. Cairns SJ, Schwager SJ. A comparison of association indices. *Anim Behav.* 1987; 35: 1454–1469. [https://doi.org/10.1016/S0003-3472\(87\)80018-0](https://doi.org/10.1016/S0003-3472(87)80018-0)

41. Bourjade M, Thierry B, Maumy M, Petit O. Decision-making in przewalski horses (*equus ferus przewalskii*) is driven by the ecological contexts of collective movements. *Ethology*. 2009; 115: 321–330. <https://doi.org/10.1111/j.1439-0310.2009.01614.x>
42. Sueur C, Petit O, Deneubourg JL. Short-term group fission processes in macaques: A social networking approach. *J Exp Biol*. 2010; 213: 1338–1346. <https://doi.org/10.1242/jeb.039016> PMID: 20348346
43. Couzin ID. Collective cognition in animal groups. *Trends in Cognitive Sciences*. 2009. pp. 36–43. <https://doi.org/10.1016/j.tics.2008.10.002> PMID: 19058992
44. Boyd L, Keiper R. Behavioural ecology of feral horses. In: Mills DS, McDonnell SM, editors. *The domestic horse: The origins, development and management of its behaviour*. Cambridge, America: Cambridge University Press; 2005. p. 55–82.
45. Oksanen J, Blanchet FG, Friendly M, Kindt R, Legendre P, Mcglinn D, et al. Package “vegan” Title Community Ecology Package Version 2.5–6. 2019.
46. Fischhoff IR, Sundaresan SR, Cordingley J, Larkin HM, Sellier M-J, Rubenstein DI. Social relationships and reproductive state influence leadership roles in movements of plains zebra, *Equus burchellii*. *Anim Behav*. 2007; 73: 825–831. <https://doi.org/10.1016/j.anbehav.2006.10.012>
47. Krueger K, Flauger B, Farmer K, Hemelrijk C. Movement initiation in groups of feral horses. *Behav Processes*. 2014; 103: 91–101. <https://doi.org/10.1016/j.beproc.2013.10.007> PMID: 24220794
48. Ozogany K, Vicsek T. Modeling leadership hierarchy in multilevel animal societies. *Cornell Univ Libr*. 2014; Physics: arXiv:1403.0260.
