# Supplementary material for: Behavioural synchronization in a multilevel society of feral horses
Source: PLOS journal article supplement (doi:10.1371/journal.pone.0258944), 2021-10-26
Supplement: S2 (10.1371/journal.pone.0258944.s002) [file journal.pone.0258944.s002]

# S2 Appendix

## The effect of time on the horses' behavioural state

We first examined whether the resting/moving behaviour of horses had a temporal periodicity. We fitted the moving rate to the periodic function  $y \sim x + \sin 2\pi x + \cos 2\pi x$ , where  $x$  is a time, with a random effect on the intercept, which is the observation date, using linear mixed model. The model was compared to null models,  $y \sim x$  and  $y \sim (constant)$ , using analysis of variance (ANOVA). The analysis was conducted under R package ‘lme4’ and ‘lmerTest’.

The ratio of moving individuals according to time is shown in Figure S2\_1. As a result, the fitted model is no better than the null models (Table S2\_1). In addition, none of the model coefficients had a 5%-level significance. We concluded that the horses did not rest or move at a particular time of day, and thus we did not consider the effect of time in further analysis.

|                                        | AIC     | BIC     | logLik | deviance | Chisq  | Df | p value |
|----------------------------------------|---------|---------|--------|----------|--------|----|---------|
| $y \sim (constant)$                    | -50.777 | -42.648 | 28.388 | -56.777  |        |    |         |
| $y \sim x$                             | -52.189 | -41.351 | 30.094 | -60.189  | 3.4119 | 1  | 0.06473 |
| $y \sim x + \sin 2\pi x + \cos 2\pi x$ | -49.049 | -32.792 | 30.524 | -61.049  | 0.8603 | 2  | 0.6504  |

**Table S2\_1.** The result of ANOVA test. logLik = log likelihood, Chisq = Chisquare.

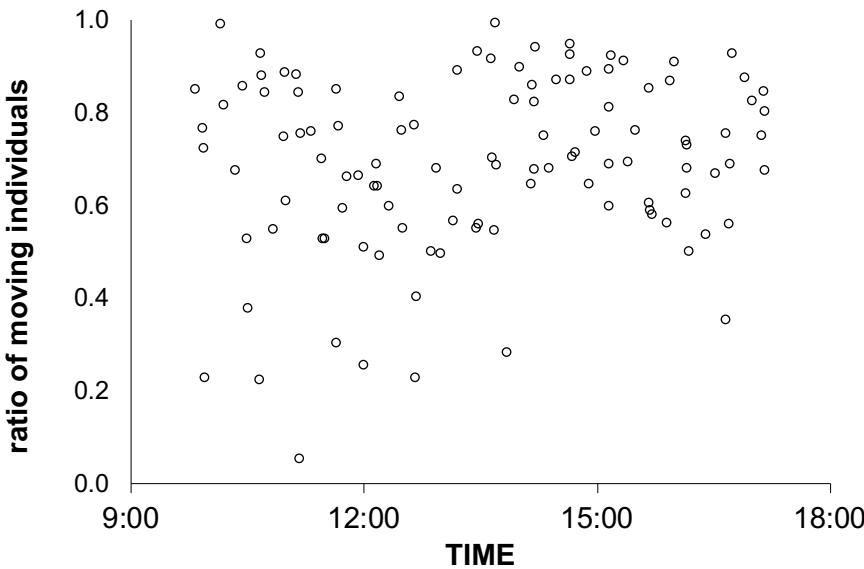

**Fig S2\_1.** The ratio of moving individuals versus time.
